# Supplementary material
Source: PubMed Central journal article supplement (PMC5451302)
Supplement: NIHMS842392-supplement-supplement_1.pdf [file NIHMS842392-supplement-supplement_1.pdf]

Supplemental Table. Clinical characteristics of study cohort

|                               | <b>Cetuximab +<br/>Bevacizumab (N=11)</b> | <b>Cetuximab + Bevacizumab +<br/>Irinotecan (N=22)</b> | <b>Total<br/>(N=33)</b> |
|-------------------------------|-------------------------------------------|--------------------------------------------------------|-------------------------|
| Median age (years)            | 53 (32-67)                                | 60 (39-74)                                             | 58 (32-74)              |
| Sex                           |                                           |                                                        |                         |
| <i>Male</i>                   | 6                                         | 14                                                     | 20                      |
| <i>Female</i>                 | 5                                         | 8                                                      | 13                      |
| Age                           | 58                                        | 59                                                     | 58                      |
| Received previous FOLFOX      | 8                                         | 20                                                     | 28                      |
| Response                      |                                           |                                                        |                         |
| <i>Progression of disease</i> | 1                                         | 5                                                      | 6                       |
| <i>Stable disease</i>         | 2                                         | 12                                                     | 20                      |
| <i>Partial response</i>       | 8                                         | 5                                                      | 7                       |
